# Supplementary material
Source: Springer Nature journal article supplement (https://www.springermedizin.de/resource/supplementary/40170_2013_16_MOESM3_ESM.pdf/25787592)

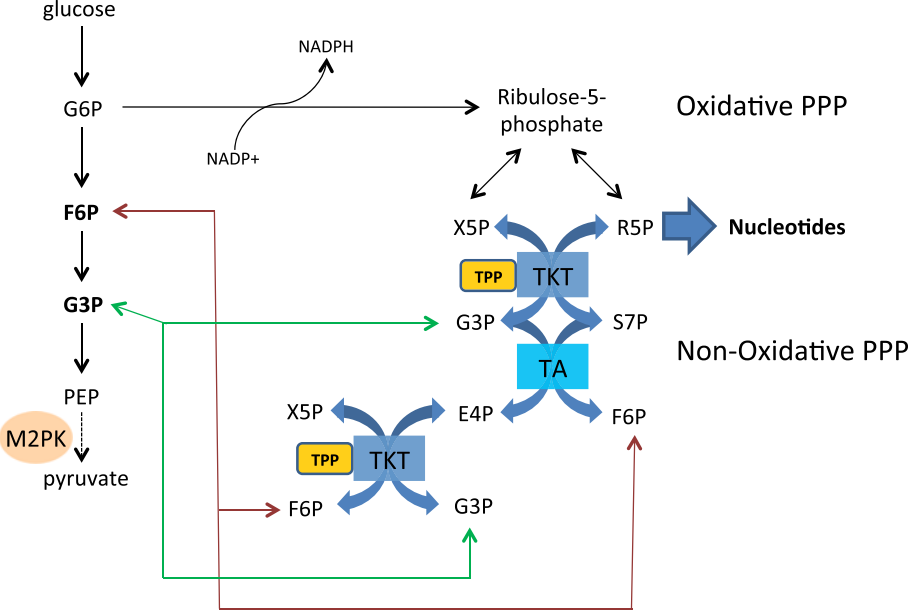

Supplement: MOESM3 [file 25787592]
